# Supplementary material
Source: PubMed Central journal article supplement (PMC3911052)
Supplement: AEM.03330-13_zam999105135so1.pdf [file AEM.03330-13_zam999105135so1.pdf]

## Supplemental material

**Table S1: Bacterial Strains and plasmids used in this study**

| Bacterial strain                          | Genotype/description                                                                                                                                      | Source/reference             |
|-------------------------------------------|-----------------------------------------------------------------------------------------------------------------------------------------------------------|------------------------------|
| <b><i>B. cepacia</i> complex strains</b>  |                                                                                                                                                           |                              |
| <i>B. cenocepacia</i> H111                | CF isolate, prototroph.                                                                                                                                   | [1, 2]                       |
| <i>B. cenocepacia</i> H111Δc3             | <i>B. cenocepacia</i> H111, pC3 deletion mutant.                                                                                                          | [3]                          |
| <i>B. cenocepacia</i> H111-hfe3           | <i>B. cenocepacia</i> H111 bearing <i>lacI</i> and <i>aacI</i> on pC3 and <i>dhfrII</i> under the control of LacI-repressed promoter pMT on chromosome 1. | This study                   |
| <i>B. cenocepacia</i> K56-2               | CF isolate, prototroph, BCESM <sup>+</sup> <i>cbIA</i> <sup>+</sup> .                                                                                     | [4]                          |
| <i>B. cenocepacia</i> K56-2ΔpC3/pBBRatoxA | <i>B. cenocepacia</i> K56-2, pC3 deletion mutant containing pBBRatoxA.                                                                                    | This study                   |
| <i>B. multivorans</i> LMG18825            | CF isolate, prototroph.                                                                                                                                   | BCCM/LMG Bacteria Collection |
| <i>B. multivorans</i> LMG18825ΔpC3        | <i>B. multivorans</i> LMG18825, pC3 deletion mutant.                                                                                                      | This study                   |
| <i>B. contaminans</i> LMG23361            | Isolate from milk of sheep with mastitis, prototroph.                                                                                                     | BCCM/LMG Bacteria Collection |
| <i>B. contaminans</i> LMG23361ΔpC3        | <i>B. contaminans</i> LMG23361, pC3 deletion mutant.                                                                                                      | This study                   |
| <i>B. diffusa</i> LMG24065                | CF isolate, prototroph.                                                                                                                                   | BCCM/LMG Bacteria Collection |
| <i>B. diffusa</i> LMG24065ΔpC3            | <i>B. diffusa</i> LMG24065, pC3 deletion mutant.                                                                                                          | This study                   |
| <i>B. latens</i> LMG24064                 | CF isolate, prototroph.                                                                                                                                   | BCCM/LMG Bacteria Collection |
| <i>B. latens</i> LMG24064ΔpC3             | <i>B. latens</i> LMG24064, pC3 deletion mutant.                                                                                                           | This study                   |
| <i>B. metallica</i> LMG24068              | CF isolate, prototroph.                                                                                                                                   | BCCM/LMG Bacteria Collection |
| <i>B. metallica</i> LMG24068ΔpC3          | <i>B. metallica</i> LMG24068, pC3 deletion mutant.                                                                                                        | This study                   |
| <i>B. seminalis</i> LMG24067              | CF isolate, prototroph.                                                                                                                                   | BCCM/LMG Bacteria Collection |
| <i>B. seminalis</i> LMG24067ΔpC3          | <i>B. seminalis</i> LMG24067, pC3 deletion mutant.                                                                                                        | This study                   |
| <i>B. arboris</i> 24066                   | Soil isolate, prototroph.                                                                                                                                 | BCCM/LMG Bacteria Collection |
| <i>B. arboris</i> 24066ΔpC3               | <i>B. arboris</i> 24066, pC3 deletion mutant.                                                                                                             | This study                   |
| <i>B. stabilis</i> LMG7000                | Blood isolate, prototroph.                                                                                                                                | BCCM/LMG Bacteria Collection |
| <i>B. stabilis</i> LMG7000 ΔpC3           | <i>B. stabilis</i> LMG7000, pC3 deletion mutant.                                                                                                          | This study                   |
| <i>B. dolosa</i> LMG18943                 | CF isolate, prototroph.                                                                                                                                   | BCCM/LMG Bacteria Collection |
| <i>B. dolosa</i> LMG18943 ΔpC3            | <i>B. dolosa</i> LMG18943, pC3 deletion mutant.                                                                                                           | This study                   |

---

**E. coli strains**

|                       |                                                                                                                     |            |
|-----------------------|---------------------------------------------------------------------------------------------------------------------|------------|
| CC118( $\lambda$ pir) | $\Delta(ara, leu)_{7697} araD139 \Delta lacX74 galE galK phoA20 thi-1 rpsE rpoB(Rf^R) argE(am) recA1 \lambda pir^+$ | [5]        |
| MC1061                | $hsdR araD139 \Delta(ara-leu)_{7697} \Delta lacX74 galU galK rpsL (Sm^R)$                                           | [6]        |
| XL1-blue              | $endA1 gyrA96(nal^R) thi-1 recA1 relA1 lac glnV44 F' [::Tn10 proAB^+ lacI^q \Delta(lacZ)M15] hsdR17(r_K^- m_K^+)$   | Stratagene |

**Plasmids**

|                                                   |                                                                                                                                                                            |                                                      |
|---------------------------------------------------|----------------------------------------------------------------------------------------------------------------------------------------------------------------------------|------------------------------------------------------|
| pMinic3                                           | Mobilisable vector consisting of the <i>B. cenocepacia</i> H111 c3 replicatory region and pEX18Tp.                                                                         | [3]                                                  |
| pSHAFT2                                           | Broad-host-range suicide plasmid ( $Cm^R$ ), mobilisable for conjugation.                                                                                                  | S. Shastri and M.S.Thomas, manuscript in preparation |
| pEX18Tp                                           | pEX18 containing <i>dhfrIII</i> ( $Tp^R$ ) between <i>EcoRV</i> and <i>AatII</i> sites.                                                                                    | [3]                                                  |
| pEX18Gm                                           | $sacB^+$ , mobilisable gene replacement vector with MCS from pUC18, $Gm^R$ .                                                                                               | [7]                                                  |
| pBBR1MCS                                          | Mobilizable BHR cloning vector; IncP and ColE1 compatible ( $Cm^I$ ).                                                                                                      | [8]                                                  |
| pSHAFT2-gabD                                      | pSHAFT2 bearing an amplified fragment of H111 pC3.                                                                                                                         | This study                                           |
| pBBR1MCS-atox2                                    | pBBR1MCS bearing the <i>atox2a</i> , <i>atox2b</i> and <i>tox2</i> TAS. Intermediate vector for pBBR1MCS:: <i>atoxA</i> construction.                                      | This study                                           |
| pBBR1MCS-atox2-atox1                              | pBBR1MCS bearing the <i>atox2a</i> , <i>atox2b</i> and <i>tox2</i> TAS and the <i>atox1</i> antitoxin gene. Intermediate vector for pBBR1MCS:: <i>atoxA</i> construction.  | This study                                           |
| pBBR1MCS:: <i>atoxA</i>                           | pBBR1MCS bearing the <i>atox2a</i> , <i>atox2b</i> and <i>tox2</i> TAS, and the <i>atox1</i> and <i>atox3</i> antitoxin genes                                              | This study                                           |
| pBBR1MCS-pMT-Tp                                   | pBBR1MCS bearing <i>dhfrIII</i> under the control of the <i>LacI</i> -controlled pMT promoter. Intermediate vector for pEX18Gm-pMT-Tp- <i>queF</i> construction.           | This study                                           |
| pEX18Gm-pMT-Tp- <i>queF</i>                       | pEX18 bearing <i>dhfrIII</i> under the control of the <i>LacI</i> -controlled pMT promoter                                                                                 | This study                                           |
| pBS-pJ23109- <i>lacI</i>                          | pBLUESCRIPTIIKS bearing <i>lacI</i> under the control of promoter <i>pJ23109</i> . Intermediate vector for pSHAFT2-noncon-pJ23109- <i>lacI</i> - <i>aacI</i> construction. | This study                                           |
| pSHAFT2-noncon-pJ23109- <i>lacI</i> - <i>aacI</i> | pSHAFT2 bearing <i>lacI</i> under the control of promoter <i>pJ23109</i> , flanked by regions amplified from pC3.                                                          | This study                                           |
| pBluescriptIIKS                                   | High copy number cloning vector ( $Ap^R$ ).                                                                                                                                | Stratagene                                           |
| pRK2013                                           | Helper plasmid for conjugation ( $Km^R$ ), ColE1 replicon.                                                                                                                 | [9]                                                  |

---

Abbreviations used within this table:  $Gm^R$ , gentamycin resistance;  $Rf^R$ , rifampicin resistance;  $Sm^R$ , streptomycin resistance;  $Tp^R$ , trimethoprim resistance;  $Cm^R$ , chloramphenicol resistance;  $Km^R$ , kanamycin resistance;  $Ap^R$ , ampicillin resistance.

**TABLE S2** Oligonucleotides used in this study

| Primer name                                                 | Sequence (5'-3')                                                                             | Reference/ notes                                                     |
|-------------------------------------------------------------|----------------------------------------------------------------------------------------------|----------------------------------------------------------------------|
| <b>For diagnosing pC3 presence</b>                          |                                                                                              |                                                                      |
| repAFor                                                     | AACAGCAACAACACCAAGTA                                                                         | This study                                                           |
| repARev                                                     | TTGCTTGCCTTCTTCTTCG                                                                          | This study                                                           |
| oriCFor1                                                    | ACCCATTTATGGGAGCACAG                                                                         | [3]                                                                  |
| oriCRev1                                                    | TGCTCCAGCATCACTTTCAC                                                                         | [3]                                                                  |
| dolpC3repAFor                                               | CGGGCTGAACAGTAACAATA                                                                         | This study                                                           |
| dolpC3repARev                                               | GCTTGCTCGCTT TCT TTTTC                                                                       | This study                                                           |
| <b>For cloning</b>                                          |                                                                                              |                                                                      |
| queFXhoFor                                                  | GCGCCTCGAGGTTCAAGCTGTATCTCGGCT                                                               | This study                                                           |
| queFKpnRev                                                  | GCGCGGTACCATCGGCTGGTTGTAGTTGGT                                                               | This study                                                           |
| queFdownxbaFor<br>2                                         | GCGCTCTAGATTACTTCGCCGGCGCCTTGT                                                               | This study                                                           |
| queFdownPstRev2                                             | GCGCCTGCAGGCAACAACCAGATGGACCGC                                                               | This study                                                           |
| MikeTFor                                                    | GTACCTTTATCAAAAAGAGTGTGACTTGTGAGCGGATAACAAT<br>GATACTTAGATTCAATTGTGAGCGGATAACAATTTACACAGC    | [10] Oligonucleotides<br>annealed to form double<br>stranded insert. |
| MikeTRev                                                    | TCGAGCTGTGTGAAATTGTTATCCGCTCACAATTGAATCTAAGT<br>ATCATTTGTTATCCGCTCACAAGTCAACACTCTTTTTGATAAAG |                                                                      |
| dhfrFor                                                     | GCGCAAGCTTACAAGAAGGATTCGACATGG                                                               | This study                                                           |
| dhfrRev                                                     | GCGCGGATCCCTTAGGCCACACGTTCAAGTG                                                              | This study                                                           |
| dsJ23109For2                                                | CAGCTAGCTCAGTCCCTAGGGACTGTGCTAGCA                                                            | Registry of Standard<br>Biological Parts.                            |
| dsJ23109Rev2                                                | AGCTTGCTAGCACAGTCCCTAGGACTGAGCTAGCTGGTAC                                                     | Oligonucleotides<br>annealed to form double<br>stranded insert.      |
| GmSmaFor                                                    | GCGCCCCGGGAAACTGTAATGCAAGTAGCG                                                               | This study                                                           |
| GmSacIRev                                                   | GCGCGAGCTCCGAATTGTTAGGTGGCGGTA                                                               | This study                                                           |
| lacI_HindFor                                                | GCGCAAGCTTACGGGTAGCAAAACAGATCG                                                               | This study                                                           |
| lacI_PstRev                                                 | GCGCCTGCAGTATCCGCTCACAATTCCACA                                                               | This study                                                           |
| gabDXbaFor                                                  | GCGCTCTAGAGGCGACGTTGAAGAAATTG                                                                | This study                                                           |
| gabDBglRev                                                  | GCGCAGATCTGTGTAGAAATAGGCGGCGA                                                                | This study                                                           |
| Atox1KpnI_F                                                 | GCGCGGTACCGATGTTGCGAAAGATGTCG                                                                | This study                                                           |
| Atox1ClaI_R                                                 | GCGCATCGATTTCGTCTTGAGCGAAATAGC                                                               | This study                                                           |
| Atox2PstI_F                                                 | GCGCCTGCAGCTGATCCCGACTATCTTCC                                                                | This study                                                           |
| Atox2BamHI_R                                                | GCGCGGATCCACATTTGGTGGAAACGCTA                                                                | This study                                                           |
| Atox3SacI_R                                                 | GCGCGAGCTCGTTCCGGCATAACGTTTCGTTA                                                             | This study                                                           |
| Atox3XbaI_F                                                 | GCGCTCTAGACCATTCGCCAGATAACTA                                                                 | This study                                                           |
| <b>For species identification by <i>recA</i> sequencing</b> |                                                                                              |                                                                      |
| BUR1                                                        | GATCGARAAGCAGTTCGGCAA                                                                        | [11]                                                                 |
| BUR2                                                        | TTGTCCCTTGCCCTGRCCGAT                                                                        |                                                                      |
| <b>For differentiating between H111 and K56-2 cells</b>     |                                                                                              |                                                                      |
| R33For                                                      |                                                                                              | Anneal to the H111, and<br>not to the K56-2, genome                  |
| R33Rev                                                      |                                                                                              |                                                                      |
| cbICFor                                                     | GATTACATAAGCCAGCGTC                                                                          | Anneal to the <i>cbIC</i> gene,<br>present in K56-2                  |
| cbICRev                                                     | ACGCATCAACGTCAATTTTC                                                                         |                                                                      |

**TABLE S3** Laboratory collection strains screened for pC3 presence

| Species/ Strain ID                     | Characteristics                                                                                              | Source/ Reference            |
|----------------------------------------|--------------------------------------------------------------------------------------------------------------|------------------------------|
| <b><i>Burkholderia ambifaria</i></b>   |                                                                                                              |                              |
| LMG17828                               | Isolated from corn roots                                                                                     | [12]                         |
| LMG19182                               | Rhizosphere organism, effective in stimulating plant growth and suppressing soil borne plant pathogens, AMMD | [12]                         |
| LMG19467                               | Isolated from CF patient, Australia                                                                          | [13]                         |
| <b><i>Burkholderia anthina</i></b>     |                                                                                                              |                              |
| LMG20980                               | Type strain; soil rhizosphere                                                                                | [13]                         |
| LMG20983                               | Isolated from CF patient, UK                                                                                 | [13]                         |
| LMG21821                               | Isolated from CF patient, USA                                                                                | BCCM/LMG collection          |
| <b><i>Burkholderia arboris</i></b>     |                                                                                                              |                              |
| LMG24066                               | Type strain; isolated from soil in Philadelphia, USA                                                         | [14]                         |
| <b><i>Burkholderia cenocepacia</i></b> |                                                                                                              |                              |
| LMG18826                               | BC7, R-3220, type strain, GV IIIA (ET-12); CF isolate, Canada                                                | BCCM/LMG collection          |
| LMG12615                               | GV IIIA (ET-12), Cbl <sup>+</sup> , BCESM <sup>+</sup> ; CF isolate, UK                                      | [15]                         |
| LMG16659                               | GV IIIB, Cbl <sup>-</sup> , BCESM <sup>+</sup> ; CF isolate, UK                                              | [15]                         |
| LMG14271                               | GV IIIB; isolated from CF patient, Belgium                                                                   | [15]                         |
| LMG6981                                | GV IIIA; bronchial washing isolate, USA                                                                      | [15]                         |
| LMG16655                               | GV III                                                                                                       | Laboratory strain collection |
| LMG16657                               | GV III                                                                                                       | Laboratory strain collection |
| R6108                                  | GV III                                                                                                       | Laboratory strain collection |
| R651                                   | GV III                                                                                                       | Laboratory strain collection |
| LMG24308                               | MCO-3; isolated from a research field, maize rhizosphere, USA                                                | BCCM/LMG collection          |
| LMG24506                               | GV IIIB, PHDC lineage, CF isolate, USA                                                                       | BCCM/LMG collection          |
| LMG24507                               | H12424, soil isolate, GV IIIB, PHDC lineage, New York, USA                                                   | BCCM/LMG collection          |
| H147                                   | GV III, R-6274                                                                                               | Laboratory strain collection |
| <b><i>Burkholderia cepacia</i></b>     |                                                                                                              |                              |
| LMG1222                                | Type strain, isolated from onion, USA                                                                        | [16]                         |
| IST408                                 | CF isolate, Portugal                                                                                         | Laboratory strain collection |
| H125                                   | Isolated from CF patient, Germany                                                                            | Laboratory strain collection |
| H194                                   | Isolated from CF patient, Germany                                                                            | Laboratory strain collection |
| LMG18821                               | GV I, R-1464                                                                                                 | BCCM/LMG collection          |
| LMG6963                                | GV I                                                                                                         | [15]                         |
| LMG14087                               | GV I                                                                                                         | Laboratory strain collection |
| S3.1                                   | Isolated from a painting facility                                                                            | Laboratory strain collection |
| RA231                                  | Isolated from a painting facility                                                                            | Laboratory strain collection |
| HH156.3                                | Isolated from a painting facility                                                                            | Laboratory strain collection |
| BASF                                   | Isolated from a painting facility                                                                            | Laboratory strain collection |
| speaky5                                | Isolated from a painting facility                                                                            | Laboratory strain collection |
| speaky6                                | Isolated from a painting facility                                                                            | Laboratory strain collection |
| speaky8                                | Isolated from a painting facility                                                                            | Laboratory strain collection |
| W220                                   | Isolated from a painting facility                                                                            | Laboratory strain collection |
| ATCC25416                              | LMG1222, type strain, GV I                                                                                   | ATCC strain collection       |
| BC2A                                   | Clinical isolate                                                                                             | Laboratory strain collection |
| <b><i>Burkholderia contaminans</i></b> |                                                                                                              |                              |
| LMG23361                               | Isolated from sheep with mastitis (milk), Spain                                                              | BCCM/LMG collection          |
| <b><i>Burkholderia diffusa</i></b>     |                                                                                                              |                              |
| LMG24065                               | Isolated from CF patient, USA                                                                                | BCCM/LMG collection          |
| <b><i>Burkholderia dolosa</i></b>      |                                                                                                              |                              |
| LMG21819                               | Isolated from CF patient, USA                                                                                | BCCM/LMG collection          |
| LMG18941                               | Isolated from CF patient, USA                                                                                | BCCM/LMG collection          |
| LMG18942                               | Isolated from CF patient, USA                                                                                | BCCM/LMG collection          |
| LMG18943                               | Isolated from CF patient, USA                                                                                | BCCM/LMG collection          |

|                                        |                                                                   |                              |
|----------------------------------------|-------------------------------------------------------------------|------------------------------|
| LMG18944                               | Isolated from CF patient, USA                                     | BCCM/LMG collection          |
| LMG18946                               | Isolated from CF patient, USA                                     | BCCM/LMG collection          |
| LMG21443                               | Isolated from <i>Alysicarpus glumaceus</i> (root nodule), Senegal | BCCM/LMG collection          |
| LMG21820                               | Isolated from CF patient, UK                                      | BCCM/LMG collection          |
| LMG18943                               | Type strain; isolated from CF patient, USA                        | [17]                         |
| <b><i>Burkholderia lata</i></b>        |                                                                   |                              |
| LMG6993                                | DSMZ 50180; Isolated from soil in Trinidad                        | [18]                         |
| LMG22485                               | Type strain; Isolated from forest soil in Trinidad and Tobago     | BCCM/LMG collection          |
| <b><i>Burkholderia latens</i></b>      |                                                                   |                              |
| LMG24064                               | Type strain; isolated from CF patient, Italy                      | BCCM/LMG collection          |
| <b><i>Burkholderia metallica</i></b>   |                                                                   |                              |
| LMG24068                               | Type strain; isolated from CF patient, USA                        | BCCM/LMG collection          |
| <b><i>Burkholderia multivorans</i></b> |                                                                   |                              |
| LMG18825                               | Isolated from CF patient, UK                                      | BCCM/LMG collection          |
| LMG17588                               | Soil enriched with anthranilate                                   | BCCM/LMG collection          |
| LMG16665                               | Isolated from brain abscess, UK                                   | BCCM/LMG collection          |
| LMG18945                               | Isolated from CF patient, UK                                      | BCCM/LMG collection          |
| R139                                   | GV II                                                             | Laboratory strain collection |
| R654                                   | GV II                                                             | Laboratory strain collection |
| H59                                    | GV II                                                             | Laboratory strain collection |
| H107                                   | GV II                                                             | Laboratory strain collection |
| H115                                   | GV II, R-6269                                                     | Laboratory strain collection |
| H131                                   | GV II                                                             | Laboratory strain collection |
| H132                                   | GV II                                                             | Laboratory strain collection |
| H133                                   | GV II                                                             | Laboratory strain collection |
| H158                                   | GV II, R-6275                                                     | Laboratory strain collection |
| H174                                   | GV II, R-6278                                                     | Laboratory strain collection |
| H179                                   | GV II                                                             | Laboratory strain collection |
| H191                                   | GV II, R-6284                                                     | Laboratory strain collection |
| LMG16660                               | Isolated from CF patient, UK                                      | BCCM/LMG collection          |
| LMG18822                               | Isolated from CF patient, Canada                                  | BCCM/LMG collection          |
| LMG18824                               | Isolated from a chronic granulomatous disease patient             | BCCM/LMG collection          |
| R1914                                  | GV II                                                             | Laboratory strain collection |
| <b><i>Burkholderia pyrrocinia</i></b>  |                                                                   |                              |
| LMG14191                               | Type strain; isolated from soil                                   | BCCM/LMG collection          |
| LMG21822                               | Isolated from cornfield soil                                      | BCCM/LMG collection          |
| LMG21823                               | Isolated from water                                               | BCCM/LMG collection          |
| <b><i>Burkholderia seminalis</i></b>   |                                                                   |                              |
| LMG24067                               | Type strain; isolated from CF patient, USA                        | [14]                         |
| <b><i>Burkholderia stabilis</i></b>    |                                                                   |                              |
| LMG7000                                | Isolated from blood, Sweden                                       | BCCM/LMG collection          |
| LMG14291                               | isolated from CF patient, Belgium                                 | BCCM/LMG collection          |
| R6270                                  | GV IV, H118                                                       | Laboratory strain collection |

|                                              |                                                                            |                              |
|----------------------------------------------|----------------------------------------------------------------------------|------------------------------|
| H134                                         | GV IV                                                                      | Laboratory strain collection |
| H145                                         | GV IV, R-6273                                                              | Laboratory strain collection |
| H162                                         | GV IV, R-6276                                                              | Laboratory strain collection |
| H173                                         | GV IV, R-6277                                                              | Laboratory strain collection |
| H175                                         | GV IV, R-10033                                                             | Laboratory strain collection |
| H177                                         | GV IV, R-6279                                                              | Laboratory strain collection |
| H193                                         | GV IV, R6280                                                               | Laboratory strain collection |
| H236                                         | GV IV                                                                      | Laboratory strain collection |
| H177 Epi                                     | GV IV, R-6281                                                              | Laboratory strain collection |
| LMG6997                                      | Isolated from ear infection, Sweden                                        | BCCM/LMG collection          |
| LMG18138                                     | isolated from CF patient, Belgium                                          | BCCM/LMG collection          |
| LMG14294                                     | Type strain, isolated from CF patient, Belgium                             | BCCM/LMG collection          |
| R3338                                        | GV VI                                                                      | [19]                         |
| <b><i>Burkholderia ubonensis</i></b>         |                                                                            |                              |
| LMG20358                                     | Type strain; isolated from surface soil, Thailand                          | [16]                         |
| LMG24263                                     | Isolated from a nosocomially infected patient, Thailand                    | BCCM/LMG collection          |
| <b><i>Burkholderia vietnamiensis</i></b>     |                                                                            |                              |
| LMG18835                                     | isolated from CF patient, USA                                              | BCCM/LMG collection          |
| LMG18836                                     | Isolated from patient suffering from chronic granulomatous disease, Canada | BCCM/LMG collection          |
| LMG6998                                      | Isolated from blood, Sweden                                                | BCCM/LMG collection          |
| LMG10929                                     | Type strain; isolated from rhizosphere of rice                             | BCCM/LMG collection          |
| LMG16232                                     | isolated from CF patient, Sweden                                           | BCCM/LMG collection          |
| LMG 6999                                     | Isolated from a neck abscess, Chile                                        | BCCM/LMG collection          |
| R921                                         | Type strain, GV V                                                          | Laboratory strain collection |
| R128                                         | Type strain, GV V                                                          | [2]                          |
| R706                                         | Type strain, GV V                                                          | Laboratory strain collection |
| R723                                         | Type strain, GV V                                                          | Laboratory strain collection |
| R1904                                        | Type strain, GV V                                                          |                              |
| LMG18835                                     | isolated from CF patient, USA                                              | BCCM/LMG collection          |
| G4                                           |                                                                            | Laboratory strain collection |
| <b>Strains included as negative controls</b> |                                                                            |                              |
| <b><i>Burkholderia gladioli</i></b>          |                                                                            |                              |
| H129                                         |                                                                            | Laboratory strain collection |
| <b><i>Burkholderia phymatum</i></b>          |                                                                            |                              |
| LMG21445                                     | Type strain; isolated from root nodule, French Guiana                      | BCCM/LMG collection          |
| <b><i>Burkholderia tuberum</i></b>           |                                                                            |                              |
| LMG21444                                     | Type strain; isolated from root nodule, South Africa                       | BCCM/LMG collection          |

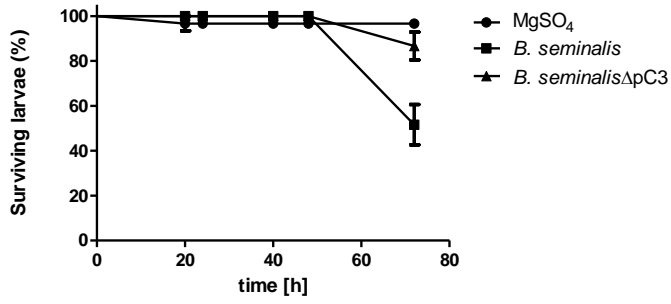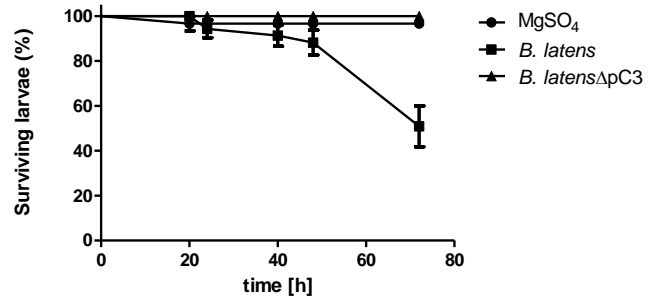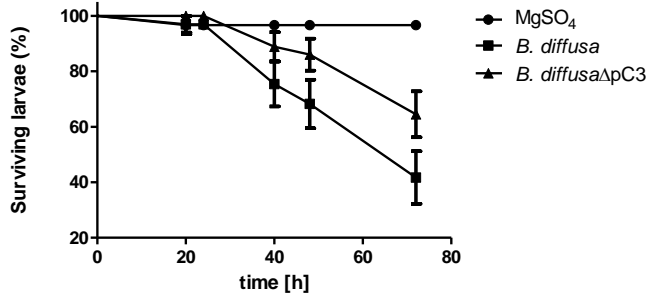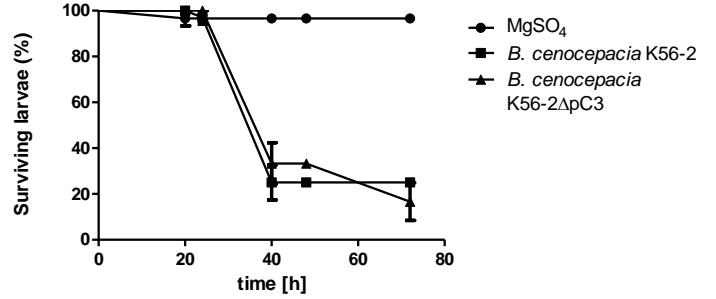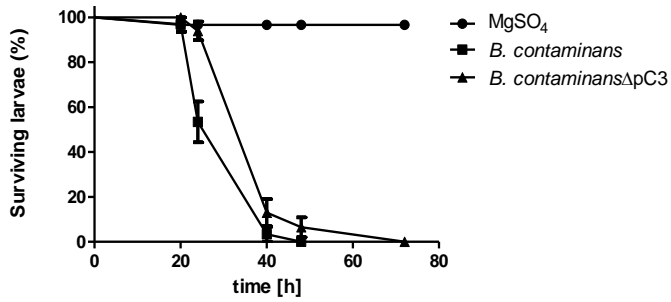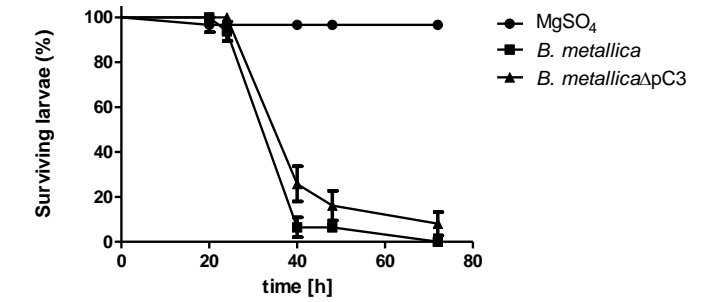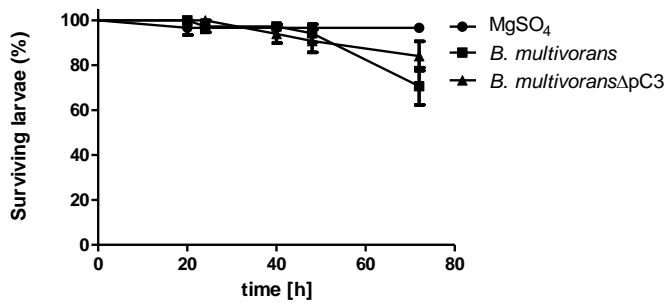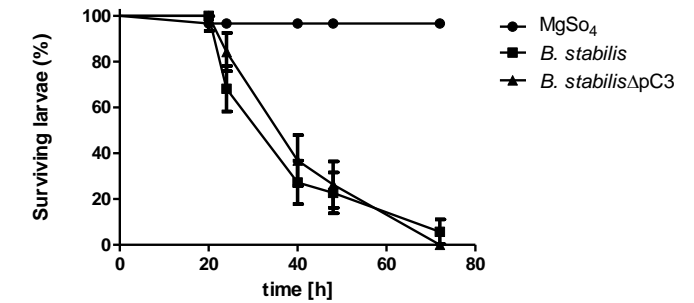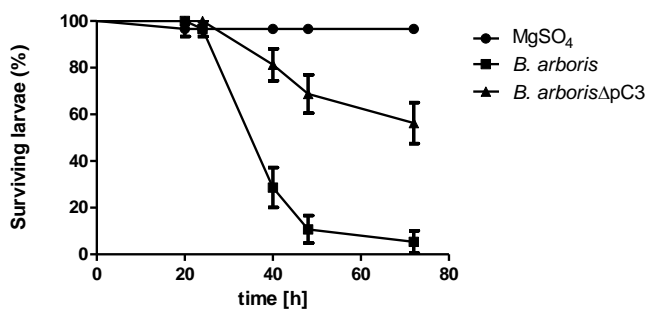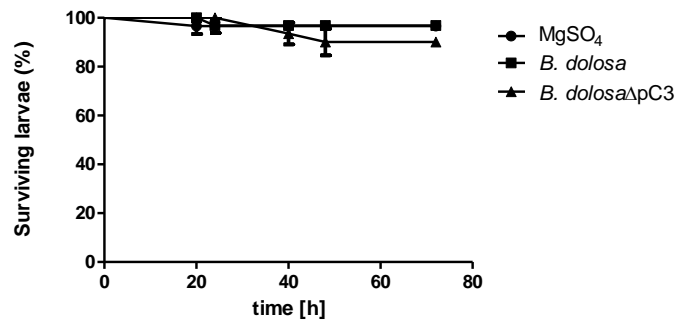

**FIG S1** WT Bcc strains show higher pathogenicity to *G. mellonella* than their pC3-null derivatives. *G. mellonella* pathogenicity assay with different strains of the Bcc and their  $\Delta$ pC3 mutants. 10  $\mu$ l of the particular strains were injected and dead/ live larvae were counted after 20, 24, 40, 48 and 72 hrs post-infection. Each experiment used 10 larvae and was carried out three times at 30°C.



***psaB***

CTGCAGCGTCGGCGGTGGTCGCCGGTAGCTCGCCCTTGCTTTTTCATATTCTTACCATAAAGTAAGGAATATTGGAGGTG  
CCGCAAATGACAGCAGCTACTATTACTTCAAAGGGTCAGGTGACCATTCCGGTGGATGTACGCAATCAACTAGGCCTGGA  
GTCCGGAGACCGGATCGAATTCAGCTTCAACGAGGCAACGGGCCGGTATGAGATCTACCCGGCCACGCGCTCGCTCGCCT  
CGCTCAAGGGCATCGTGAAAAAGCCCGAGAAATCGGTGTCAATCGAGGACATGAATCGGGCCATCGCCGAACAGGGAGC  
GTCCGCGCGATGA

***psaA***

ATGATAGGACTGGATACGAACGTGCTGGTCCGCTATTTTCGCTCAAGACGATGCCGTGCAATCAAAGAGGGCGACCGCGCT  
GATGGAGTCGTTGTCGGCGGAGCGTCCGGGGTACGTTTCGAGGTGGCGCTGGTCGAGGTCGTCTGGGTGCTGGGACGT  
TGCTACGGCGTAGAGCGGAACAGATAACAGACATCATCGACTCAATGACCGCTACGAAGGAAGTGGCCGTTGAAGGGC  
CTGACACGGTGCAGAAAGGCACTTCGCGTTTTTCGCGGCATCACCGAAGGCGGATTTTTCGCGATTGCTGATCGAGCGGTCG  
GCACACGTCGTGGGTGCGAGTACACAGCAACCTTCGACGTGGCCGCTCAAAGGTCGCTGGCATGCGGTTGATAAAGTA  
A

***psbB***

ATGTGGTTCTGGCAGCACCAACCTCGGATCGCCAGAACCAATTTGCTGGCCAGTTCCTGGCCAGCGTTTTTTTATTCCTCG  
AGCCGATCTCGTCGGCTCGTTTGCCGGGCGCTTATCCGGACAAACCGAAAGACCGTTTTGTTCCGGGAATTCGTTAGAGC  
GAGGCGAGCGGTGGCTGGATGACCGCTCGTTTTGCGCGGATCCTTTATCGGGTAA

***psbC***

GTGGGAAGTGCCGAATCGCGACGATGTCTTCGCGTTTTCCGGGCGCGCGGGCAGACCTGATCGCCTCCGCCAGCCTGGCCT  
GAACTGCGATCACAGATTGTTGCGCGGGCGCGGTCCGGGACCGCTCCGATTCTGGGGACGCGGTGCTGACGAGCCCG  
TCCGTCTGTACGCGCAGGCCGTCTAATGCATGTGGTTCTGGCAGCACCAACCTCGGATCGCCAGAACCAATTTGCTGGCC  
AGTTCACTGGCCAGCGTTTTTTTATTCCTCGAGCCGATCTCGTCGGCTCGTTTTGCCGGGCGCTTATCCGGACAAACCGAAAG  
ACCGTTTTGTTCCGGGAATTCGTTAGAGCGAGGCGAGCGGTGGCTGGATGACCGCTCGTTTTGCGCGGATCCTTTATCG  
GGTAAGGTCAGGCAACGCTGCATCGGTAGCGGCACATCGGACACTGTCCCACGCATCGCGTCAATCGCGTCAGCTCC  
ATGCCCTGA

***psbA***

CTGCATCGTCGGTAGCGGCACATCGGACACTGTCCCACGCATCGCGTCAATCGCGTCAGCTCCATGCCCTGATCTTCGTCC  
CCGTCACGCACGCCGACGCCGAAGCGCTCGTCGCGATCCGCATCGCCGCGATGCGCGACAGCCTCGCGCGCATCGGCCGT  
TTCGATCCGCGAGCGTGCAGCGGAGCGGTTTTCTCGCGTCTTCGATCCGGCGCGATGCCGTTTTGTCGAAGTCGACCATTCG  
CGTGCGGGTTTTCTACACGCTTCGCCCAGGGCGGATCACTGTTGCTCGACCATCTGTACATCGTCCCGCGCATCAGGG  
GAAGGGCATCGGCGCCGCCGTGCTGCGCGAGATTTGGCCGAAGCCGACGAACACCGGATGCCCGTTCACGTCGGCGCG  
CTGCGCGGCGAGCGACTCGAACCCTTCTACGAACGGCATGGCTTCGTGCGAACCAGGCGAAGCGGAATGGGACATCTACTA  
CCGGCGGAACCGGGCACGGCGACGACGTAG

***pscA***

ATGCACTAGCGATGCTTTCTTGATCTGGTCCGCGCCGCAACCAGGACAGCATTTGGCCTTTTCTTTTTGCTCATCTTTTATG  
CACCAGAGATCACATGAACGCACATTTCCGCACTTTTAGAGCGCCCCCTATTGGGGCGGCGCTGAATAGTGCCTGGTTCGA  
GATTATACCCACCCGCAACATCACGCGGATGAAGACCCACACATCCTTGCAGCAGCGCTTCGGAGCGCGGTTAGACAG  
CTTCGGAAAGAGAAGACGGACCTTAGCCAAGAAGCCTTCGCCGATAAAGTCGGCTTTGCCGCTCCTACTTCGGTTCGGGT  
CGAAACGGGCAAGGCGAACCCATCACTCGATGCAATTCAAACCATCGCGGAAGGTTGGGCGTCAAGTGAGCGCTCTTT  
TCGAGGACGACGATTAG

**FIG S2** Putative toxin antitoxin gene sequences identified on pC3<sub>K56-2</sub> using RASTA Bacteria.

**TABLE S4** Phenotypic microarray results showing carbon utilisation phenotypes (Biolog plate PM1) that differ between wt strains and their pC3-null derivatives<sup>12</sup>.

| Phenotype observed                | <i>B. cenocepacia</i> |       |        | <i>B. ambifaria</i> | <i>B. anthina</i> | <i>B. vietnamiensis</i> | <i>B. pyrrocinia</i> | <i>B. lata</i> | <i>B. ubonensis</i> | <i>B. arboris</i> | <i>B. metallica</i> | <i>B. semihalis</i> | <i>B. contortinans</i> | <i>B. diffusa</i> | <i>B. stabilis</i> | <i>B. multivorans</i> | <i>B. latens</i> | <i>B. dolosa</i> |          |
|-----------------------------------|-----------------------|-------|--------|---------------------|-------------------|-------------------------|----------------------|----------------|---------------------|-------------------|---------------------|---------------------|------------------------|-------------------|--------------------|-----------------------|------------------|------------------|----------|
|                                   | H111                  | MCO-3 | H12424 | K56-2               | AMMD              | LMG20983                | LMG10929             | LMG14191       | 383                 | LMG20358          | LMG24066            | LMG24068            | LMG24067               | LMG23361          | LMG24065           | LMG7000               | LMG18825         | LMG24064         | LMG18943 |
| PM1                               |                       |       |        |                     |                   |                         |                      |                |                     |                   |                     |                     |                        |                   |                    |                       |                  |                  |          |
| D-xylose                          | +++                   | +++   | +++    | +++                 | +++               | +++                     | +++                  |                | +++                 |                   |                     |                     | +++                    | +++               |                    |                       |                  | +++              |          |
| thymidine                         | +++                   | +++   | +++    | +                   |                   |                         | +                    | +              | +                   |                   |                     |                     |                        |                   |                    |                       |                  |                  |          |
| tricarballic acid                 |                       | +++   |        | +++                 |                   |                         |                      |                |                     |                   |                     | +++                 |                        |                   |                    | +++                   | +++              | +++              |          |
| D-aspartic acid                   |                       |       |        |                     | +++               |                         | +++                  |                |                     | +++               |                     |                     |                        | +++               |                    |                       |                  |                  |          |
| Succinic acid                     |                       |       |        |                     |                   |                         | ++                   | +              |                     |                   |                     |                     |                        |                   |                    |                       |                  |                  | +        |
| D-galacturonic acid               |                       |       |        |                     |                   |                         | +++                  |                |                     |                   |                     | +                   |                        |                   |                    |                       |                  | +                |          |
| p-hydroxyphenylacetic acid        |                       |       |        |                     |                   |                         |                      | +              |                     |                   |                     |                     |                        |                   |                    |                       |                  | +                | +        |
| M-tartaric acid                   |                       |       |        |                     |                   |                         |                      | +++            |                     |                   |                     |                     |                        |                   | +++                |                       |                  |                  |          |
| D-cellobiose                      | +                     |       |        |                     |                   |                         | ++                   |                |                     |                   |                     |                     |                        |                   |                    |                       |                  |                  |          |
| m-hydroxyphenylacetic acid        |                       |       |        |                     |                   | +                       |                      |                |                     |                   |                     |                     |                        |                   |                    |                       |                  |                  |          |
| 2-amino ethanol                   |                       |       |        |                     |                   |                         |                      |                |                     | -                 |                     |                     |                        |                   | -                  |                       |                  |                  |          |
| D-trehalose                       |                       |       |        |                     |                   |                         | +                    |                |                     |                   |                     |                     |                        |                   |                    |                       |                  |                  |          |
| D-threonine                       |                       | +     |        |                     |                   |                         |                      |                |                     |                   |                     |                     |                        |                   |                    |                       |                  |                  |          |
| L-alanyl glycine                  |                       |       |        |                     | -                 |                         |                      |                |                     |                   |                     |                     | +                      |                   |                    |                       |                  |                  |          |
| D-galactonic acid-γ-lactone       |                       |       |        |                     |                   |                         | +                    |                |                     |                   |                     |                     |                        |                   |                    |                       |                  |                  |          |
| D-glucuronic acid                 |                       |       |        |                     |                   |                         | +                    |                |                     | -                 |                     |                     |                        |                   |                    |                       |                  |                  |          |
| L-lactic acid                     |                       |       |        |                     |                   |                         | +                    |                |                     |                   |                     |                     |                        |                   |                    |                       |                  |                  |          |
| D-mannitol                        |                       |       |        |                     |                   |                         | +                    |                |                     |                   |                     |                     |                        |                   |                    |                       |                  |                  |          |
| D-fructose-6-phosphate            |                       |       |        |                     |                   |                         | ++                   |                |                     |                   |                     |                     |                        |                   |                    |                       |                  |                  |          |
| maltose                           |                       |       |        |                     |                   |                         | +                    |                |                     |                   |                     |                     |                        |                   |                    |                       |                  |                  |          |
| D-melibiose                       |                       |       |        |                     |                   |                         | ++                   |                |                     |                   |                     |                     |                        |                   |                    |                       |                  |                  |          |
| α-D-lactose                       |                       |       |        |                     |                   |                         | +                    |                |                     |                   |                     |                     |                        |                   |                    |                       |                  |                  |          |
| lactulose                         |                       |       |        |                     |                   |                         | +++                  |                |                     |                   |                     |                     |                        |                   |                    |                       |                  |                  |          |
| uridine                           |                       |       |        |                     |                   |                         | +                    |                |                     |                   |                     |                     |                        |                   |                    |                       |                  |                  |          |
| α-hydroxy glutaric acid-γ-lactone |                       |       |        |                     |                   |                         | +                    |                |                     |                   |                     |                     |                        |                   |                    |                       |                  |                  |          |
| maltotriose                       |                       |       |        |                     |                   |                         | ++                   |                |                     |                   |                     |                     |                        |                   |                    |                       |                  |                  |          |
| 2-deoxy adenosine                 |                       |       |        |                     |                   |                         | ++                   |                |                     |                   |                     |                     |                        |                   |                    |                       |                  |                  |          |
| glycolic acid                     |                       |       |        |                     |                   |                         | +                    |                |                     |                   |                     |                     |                        |                   |                    |                       |                  |                  |          |
| glyoxylic acid                    |                       |       |        |                     |                   |                         | +                    |                |                     |                   |                     |                     |                        |                   |                    |                       |                  |                  |          |
| inosine                           |                       |       |        |                     |                   |                         | +                    |                |                     |                   |                     |                     |                        |                   |                    |                       |                  |                  |          |
| N-acetyl-b-D-mannosamine          |                       |       |        |                     |                   |                         | +                    |                |                     |                   |                     |                     |                        |                   |                    |                       |                  |                  |          |
| D-psicose                         |                       |       |        |                     |                   |                         | +                    |                |                     |                   |                     |                     |                        |                   |                    |                       |                  |                  |          |
| glucuronamide                     |                       |       |        |                     |                   |                         | +                    |                |                     |                   |                     |                     |                        |                   |                    |                       |                  |                  |          |
| Tween 40                          |                       | +     |        |                     |                   |                         |                      |                |                     |                   |                     |                     |                        |                   |                    |                       |                  |                  |          |
| D-ribose                          |                       | +     |        |                     |                   |                         |                      |                |                     |                   |                     |                     |                        |                   |                    |                       |                  |                  |          |
| tyramine                          |                       |       | -      |                     |                   |                         |                      |                |                     |                   |                     |                     |                        |                   |                    |                       |                  |                  |          |
| D-mannose                         |                       |       |        |                     |                   |                         | -                    |                |                     |                   |                     |                     |                        |                   |                    |                       |                  |                  |          |
| D-glucose-6-phosphate             |                       |       |        |                     |                   |                         | +                    |                |                     |                   |                     |                     |                        |                   |                    |                       |                  |                  |          |
| dulcitol                          |                       |       |        |                     |                   |                         | +                    |                |                     |                   |                     |                     |                        |                   |                    |                       |                  |                  |          |
| D,L-malic acid                    |                       |       |        |                     |                   |                         |                      |                |                     | -                 |                     |                     |                        |                   |                    |                       |                  |                  |          |
| L-glutamic acid                   |                       |       |        |                     |                   |                         |                      |                |                     | -                 |                     |                     |                        |                   |                    |                       |                  |                  |          |
| L-malic acid                      |                       |       |        |                     |                   |                         |                      |                |                     | -                 |                     |                     |                        |                   |                    |                       |                  |                  |          |
| α-keto butyric acid               |                       |       |        |                     |                   |                         |                      |                |                     |                   |                     | +                   |                        |                   |                    |                       |                  |                  |          |
| α-hydroxybutyric acid             |                       |       |        |                     |                   |                         |                      |                |                     |                   |                     | +                   |                        |                   |                    |                       |                  |                  |          |
| formic acid                       |                       |       |        |                     |                   |                         |                      |                |                     |                   |                     | +                   |                        |                   |                    |                       |                  |                  |          |
| L-galactonic acid-γ-lactone       |                       |       |        |                     |                   |                         |                      |                |                     |                   |                     |                     |                        | +++               |                    |                       |                  |                  |          |
| propionic acid                    |                       |       |        |                     |                   |                         |                      |                |                     |                   |                     |                     | +                      |                   |                    |                       |                  |                  |          |
| methyl-pyruvate                   |                       |       |        |                     |                   |                         |                      |                |                     |                   |                     |                     |                        |                   | +                  |                       |                  |                  |          |
| L-threonine                       |                       |       |        |                     |                   |                         |                      |                |                     |                   |                     |                     |                        |                   |                    |                       |                  | +                |          |
| pyruvic acid                      |                       |       |        |                     |                   |                         |                      |                |                     |                   |                     |                     |                        |                   |                    |                       |                  |                  | +        |

<sup>1</sup>Differences in respiration between WT and c3-null derivative have been scored as follows: +++, wt OD<sub>590</sub> > 4 x c3-null OD<sub>590</sub>; ++, wt OD<sub>590</sub> > 3 x c3-null OD<sub>590</sub>; +, wt OD<sub>590</sub> > 2 x c3-null OD<sub>590</sub>; ---, c3-null OD<sub>590</sub> > 4 x wt OD<sub>590</sub>; --, c3-null OD<sub>590</sub> > 3 x wt OD<sub>590</sub>; -, c3-null OD<sub>590</sub> > 2 x wt OD<sub>590</sub>.

<sup>2</sup>Phenotypes which are influenced by c3 in more than two species have been shaded.

**TABLE S5** Phenotypic microarray results showing carbon utilisation phenotypes (Biolog plate PM2a) that differ between wt strains and their pC3-null derivatives<sup>1, 2</sup>.

| Phenotype observed         | <i>B. cenocepacia</i> |       |        | <i>B. ambifaria</i> | <i>B. anthina</i> | <i>B. vietnamiensis</i> | <i>B. pyrrocinia</i> | <i>B. lata</i> | <i>B. ubonensis</i> | <i>B. arboris</i> | <i>B. metallica</i> | <i>B. semihalis</i> | <i>B. contortinans</i> | <i>B. diffusa</i> | <i>B. stabilis</i> | <i>B. multivorans</i> | <i>B. latens</i> | <i>B. dolosa</i> |          |
|----------------------------|-----------------------|-------|--------|---------------------|-------------------|-------------------------|----------------------|----------------|---------------------|-------------------|---------------------|---------------------|------------------------|-------------------|--------------------|-----------------------|------------------|------------------|----------|
|                            | H111                  | MCO-3 | H12424 | K56-2               | AMMD              | LMG20983                | LMG10929             | LMG14191       | 383                 | LMG20358          | LMG24066            | LMG24068            | LMG24067               | LMG23361          | LMG24065           | LMG7000               | LMG18825         | LMG24064         | LMG18943 |
| <b>PM2a</b>                |                       |       |        |                     |                   |                         |                      |                |                     |                   |                     |                     |                        |                   |                    |                       |                  |                  |          |
| caproic acid               | +++                   | +     | ++     | +++                 | +++               | +                       | +                    | +              | +++                 | +                 | +                   | +++                 | +++                    | +++               | +++                | +                     | +++              | +++              | +++      |
| butyric acid               | +++                   |       |        | ++                  | +                 | +                       | +                    |                | +                   | ++                | +                   | +                   | ++                     | +                 | +                  |                       | +                | ++               | ++       |
| sorbic acid                | +                     |       |        | ++                  | +                 | -                       |                      |                | ++                  | +                 | ++                  |                     | +                      | +                 | ++                 | +                     |                  |                  |          |
| L-isoleucine               | +++                   | +++   | +++    | ++                  | +++               |                         | ++                   |                | ++                  | +++               |                     |                     |                        |                   |                    |                       | +                |                  |          |
| L-lysine                   |                       |       | +      | ++                  | +                 |                         | +                    | +              |                     | +                 | +                   |                     | +                      |                   |                    |                       |                  |                  |          |
| 2-deoxy-D-ribose           |                       |       |        | ++                  |                   |                         | +                    | ++             | +++                 |                   |                     | +                   |                        |                   | ++                 |                       |                  |                  |          |
| putrescine                 | ++                    |       |        | ++                  |                   |                         | +                    | +++            |                     |                   |                     |                     |                        |                   | +++                |                       |                  |                  |          |
| hydroxy-L-proline          |                       |       |        | +++                 | +++               |                         |                      |                |                     |                   |                     |                     |                        | +++               |                    | +++                   | +++              | +++              | +++      |
| gelatin                    | +++                   | +     | +++    |                     |                   |                         |                      |                |                     | ++                |                     |                     |                        |                   | +                  |                       |                  |                  |          |
| citraconic acid            | +++                   | +     | ++     |                     |                   |                         |                      |                |                     |                   |                     |                     | +                      |                   |                    |                       |                  |                  |          |
| capric acid                |                       |       |        | ++                  |                   |                         | ++                   | ++             |                     |                   |                     |                     |                        | +++               |                    |                       |                  |                  |          |
| salicin                    |                       |       |        |                     |                   |                         | +                    | ++             |                     |                   | +++                 |                     | +++                    |                   |                    |                       |                  |                  |          |
| δ-Amino Valeric Acid       |                       | +++   | +++    |                     |                   |                         | +                    |                |                     |                   |                     |                     |                        |                   |                    |                       |                  |                  |          |
| pectin                     | +++                   |       | -      |                     |                   |                         | ++                   |                |                     |                   |                     |                     | +                      |                   |                    |                       |                  |                  |          |
| 2,3-butanediol             |                       |       | +      |                     |                   |                         | +                    |                |                     |                   |                     |                     |                        |                   | +                  |                       |                  |                  |          |
| L-ornithine                | +++                   |       | +++    |                     |                   |                         |                      |                |                     | +                 |                     |                     |                        |                   |                    |                       |                  |                  |          |
| arbutin                    |                       |       |        |                     |                   |                         |                      | +++            |                     |                   | +++                 |                     | +++                    |                   |                    |                       |                  |                  |          |
| I-arabitol                 |                       |       |        |                     |                   |                         | +                    |                |                     |                   |                     | ++                  |                        |                   |                    |                       |                  |                  |          |
| Itaconic acid              |                       |       |        |                     |                   | -                       |                      |                |                     |                   |                     |                     |                        |                   | +++                |                       |                  |                  |          |
| succinamic acid            |                       |       | +      |                     |                   |                         | +                    |                |                     |                   |                     |                     |                        |                   |                    |                       |                  |                  |          |
| L-methionine               |                       |       | ++     |                     |                   |                         | ++                   |                |                     |                   |                     |                     |                        |                   |                    |                       |                  |                  |          |
| 2,3-butanone               |                       |       | +      |                     |                   |                         | +                    |                |                     |                   |                     |                     |                        |                   |                    |                       |                  |                  |          |
| 5-keto-D-gluconic acid     | +                     |       | -      |                     |                   |                         |                      |                |                     |                   |                     |                     |                        |                   |                    |                       |                  |                  |          |
| D-ribono-1,4-lactone       |                       | +     |        |                     |                   |                         |                      |                |                     |                   |                     |                     |                        |                   |                    |                       |                  |                  |          |
| 2-hydroxybenzoic acid      |                       |       |        |                     |                   |                         |                      | +              |                     |                   |                     |                     |                        |                   |                    |                       |                  |                  |          |
| laminarin                  |                       |       |        |                     |                   |                         | +                    |                |                     |                   |                     |                     |                        |                   |                    |                       |                  |                  |          |
| I-erythritol               |                       |       |        |                     |                   |                         | +                    |                |                     |                   |                     |                     |                        |                   |                    |                       |                  |                  |          |
| β-methyl-D-xyloside        |                       |       |        |                     |                   |                         | +                    |                |                     |                   |                     |                     |                        |                   |                    |                       |                  |                  |          |
| palatinose                 |                       |       |        |                     |                   |                         | +                    |                |                     |                   |                     |                     |                        |                   |                    |                       |                  |                  |          |
| β-methyl-D-galactoside     |                       |       |        |                     |                   |                         | +                    |                |                     |                   |                     |                     |                        |                   |                    |                       |                  |                  |          |
| γ-hydroxy butyric acid     |                       |       |        |                     |                   |                         | +                    |                |                     |                   |                     |                     |                        |                   |                    |                       |                  |                  |          |
| L-leucine                  |                       |       |        |                     |                   |                         | ++                   |                |                     |                   |                     |                     |                        |                   |                    |                       |                  |                  |          |
| oxalomalic acid            |                       |       |        |                     |                   |                         | +                    |                |                     |                   |                     |                     |                        |                   |                    |                       |                  |                  |          |
| 3-hydroxy-2-butanone       |                       |       |        |                     |                   |                         | ++                   |                |                     |                   |                     |                     |                        |                   |                    |                       |                  |                  |          |
| lactitol                   |                       |       | +      |                     |                   |                         |                      |                |                     |                   |                     |                     |                        |                   |                    |                       |                  |                  |          |
| γ-cyclodextrin             |                       |       |        |                     |                   |                         | +                    |                |                     |                   |                     |                     |                        |                   |                    |                       |                  |                  |          |
| maltitol                   |                       |       |        |                     |                   |                         | +                    |                |                     |                   |                     |                     |                        |                   |                    |                       |                  |                  |          |
| L-pyrogutamic acid         |                       |       |        |                     |                   |                         |                      | +              |                     |                   |                     |                     |                        |                   |                    |                       |                  |                  |          |
| Citramalic acid            |                       |       |        |                     |                   |                         |                      | +              |                     |                   |                     |                     |                        |                   |                    |                       |                  |                  |          |
| D-arabitol                 |                       |       |        |                     |                   |                         |                      |                |                     |                   |                     |                     |                        |                   |                    |                       |                  |                  |          |
| L-tartaric acid            |                       |       |        |                     |                   |                         |                      |                |                     |                   |                     | -                   |                        |                   |                    |                       |                  |                  |          |
| quinic acid                |                       |       |        |                     |                   |                         |                      |                |                     |                   |                     |                     |                        |                   |                    |                       |                  | +++              |          |
| D-arabinose                |                       |       |        |                     |                   |                         |                      |                |                     |                   |                     |                     |                        |                   |                    |                       |                  |                  | +        |
| arginine                   |                       |       |        | ++                  |                   |                         |                      |                |                     |                   |                     |                     |                        |                   |                    |                       |                  |                  |          |
| D-lactic acid methyl ester |                       |       |        | -                   |                   |                         |                      |                |                     |                   |                     |                     |                        |                   |                    |                       |                  |                  |          |

<sup>1</sup>Differences in respiration between WT and c3-null derivative have been scored as follows: +++, wt OD<sub>590</sub> > 4 x c3-null OD<sub>590</sub>; ++, wt OD<sub>590</sub> > 3 x c3-null OD<sub>590</sub>; +, wt OD<sub>590</sub> > 2 x c3-null OD<sub>590</sub>; ---, c3-null OD<sub>590</sub> > 4 x wt OD<sub>590</sub>; --, c3-null OD<sub>590</sub> > 3 x wt OD<sub>590</sub>; -, c3-null OD<sub>590</sub> > 2 x wt OD<sub>590</sub>.

<sup>2</sup>Phenotypes which are influenced by c3 in more than two species have been shaded.

**TABLE S6** Phenotypic microarray results showing nitrogen utilisation phenotypes (Biolog plate PM3b) that differ between wt strains and their pC3-null derivatives<sup>12</sup>.

| Phenotype observed         | <i>B. cenocepacia</i> |       |        |       | <i>B. ambifaria</i> | <i>B. anthina</i> | <i>B. vietnamiensis</i> | <i>B. pyrrocinia</i> | <i>B. lata</i> | <i>B. ubonensis</i> | <i>B. arboris</i> | <i>B. metallica</i> | <i>B. semihalis</i> | <i>B. contaminans</i> | <i>B. diffusa</i> | <i>B. stabilis</i> | <i>B. multivorans</i> | <i>B. latens</i> | <i>B. dolosa</i> |
|----------------------------|-----------------------|-------|--------|-------|---------------------|-------------------|-------------------------|----------------------|----------------|---------------------|-------------------|---------------------|---------------------|-----------------------|-------------------|--------------------|-----------------------|------------------|------------------|
|                            | H111                  | MCO-3 | H12424 | K56-2 | AMMD                | LMG20983          | LMG10929                | LMG14191             | 383            | LMG20358            | LMG24066          | LMG24068            | LMG24067            | LMG23361              | LMG24065          | LMG7000            | LMG18825              | LMG24064         | LMG18943         |
| <b>PM3b</b>                |                       |       |        |       |                     |                   |                         |                      |                |                     |                   |                     |                     |                       |                   |                    |                       |                  |                  |
| histamine                  | +++                   | +++   | +++    | +++   | ++                  |                   | ++                      | +++                  | +++            |                     | ++                | +                   | ++                  |                       | ++                |                    | +                     |                  |                  |
| uracil                     | +++                   | +++   | +++    |       |                     | ++                |                         | ++                   | +              | ++                  |                   |                     |                     |                       |                   |                    |                       |                  | +                |
| cytidine                   | +                     |       | +      |       |                     |                   |                         |                      |                | ++                  | +                 |                     |                     | +                     |                   | +                  |                       |                  |                  |
| thymidine                  | +                     | +++   | +++    |       |                     |                   |                         | ++                   |                | ++                  |                   |                     |                     |                       |                   |                    |                       |                  |                  |
| thymine                    | +++                   | ++    | +++    |       |                     |                   |                         | ++                   |                |                     |                   |                     |                     |                       |                   |                    |                       |                  |                  |
| L-methionine               |                       | -     |        | +     | -                   |                   | -                       |                      |                |                     |                   |                     |                     |                       |                   |                    |                       |                  |                  |
| ammonia                    |                       |       | +++    |       |                     |                   | +                       |                      |                | -                   |                   |                     |                     |                       |                   |                    | ++                    |                  |                  |
| alloxan                    | -                     | -     | +      |       |                     |                   |                         |                      |                |                     |                   |                     |                     |                       |                   |                    |                       |                  |                  |
| cytosine                   |                       |       |        |       |                     | +                 |                         |                      | +              |                     |                   |                     | ++                  |                       |                   |                    |                       |                  |                  |
| xanthine                   |                       |       |        |       |                     |                   |                         |                      |                |                     | +                 | +                   |                     |                       |                   |                    | -                     |                  |                  |
| D-aspartic acid            |                       |       |        |       | ++                  |                   |                         | +++                  |                |                     |                   |                     |                     |                       | ++                |                    |                       |                  |                  |
| ε-Amino-N-caproic acid     | -                     |       |        |       | -                   |                   |                         |                      |                |                     |                   |                     |                     |                       |                   |                    |                       |                  |                  |
| nitrate                    |                       |       |        |       |                     | -                 |                         |                      |                |                     |                   |                     |                     |                       |                   |                    |                       |                  |                  |
| biuret                     |                       | ---   |        |       |                     |                   | -                       |                      |                |                     |                   |                     |                     |                       |                   |                    |                       |                  |                  |
| guanosine                  |                       |       |        |       | -                   |                   | ++                      |                      |                |                     |                   |                     |                     |                       |                   |                    |                       |                  |                  |
| Ala-Asp                    |                       |       |        |       |                     |                   | +                       |                      |                |                     |                   | +                   |                     |                       |                   |                    |                       |                  |                  |
| putrescine                 |                       |       |        |       |                     |                   |                         |                      | ++             |                     |                   |                     |                     |                       |                   |                    |                       |                  | -                |
| N-acetyl-D-galactosamine   | +                     |       |        |       |                     |                   |                         |                      |                |                     |                   |                     |                     |                       |                   |                    |                       |                  |                  |
| D-galactosamine            | +++                   |       |        |       |                     |                   |                         |                      |                |                     |                   |                     |                     |                       |                   |                    |                       |                  |                  |
| xanthosine                 |                       | -     |        |       |                     |                   |                         |                      |                |                     |                   |                     |                     |                       |                   |                    |                       |                  |                  |
| N-acetyl-D-mannosamine     |                       | -     |        |       |                     |                   |                         |                      |                |                     |                   |                     |                     |                       |                   |                    |                       |                  |                  |
| uridine                    |                       | +     |        |       |                     |                   |                         |                      |                |                     |                   |                     |                     |                       |                   |                    |                       |                  |                  |
| Gly-Glu                    |                       |       |        |       |                     |                   | +                       |                      |                |                     |                   |                     |                     |                       |                   |                    |                       |                  |                  |
| Met-Ala                    |                       |       |        |       |                     |                   | ++                      |                      |                |                     |                   |                     |                     |                       |                   |                    |                       |                  |                  |
| urea                       |                       |       |        |       |                     |                   |                         |                      | +              |                     |                   |                     |                     |                       |                   |                    |                       |                  |                  |
| Ala-gly                    |                       |       |        |       | -                   |                   |                         |                      |                |                     |                   |                     |                     |                       |                   |                    |                       |                  |                  |
| Ethylenediamine            |                       |       |        |       |                     |                   |                         | ++                   |                |                     |                   |                     |                     |                       |                   |                    |                       |                  |                  |
| D-L-α-amino-N-butyric acid |                       |       |        |       |                     |                   | +                       |                      |                |                     |                   |                     |                     |                       |                   |                    |                       |                  |                  |
| adenine                    |                       |       |        |       |                     |                   |                         |                      | +              |                     |                   |                     |                     |                       |                   |                    |                       |                  |                  |
| L-pyroglutamic acid        |                       |       |        |       |                     |                   |                         |                      |                |                     |                   |                     |                     |                       |                   |                    |                       |                  |                  |
| D-asparagine               |                       |       |        |       |                     |                   |                         |                      |                |                     |                   |                     |                     |                       |                   |                    |                       |                  |                  |
| agmatine                   |                       |       |        |       |                     |                   |                         |                      |                |                     |                   |                     |                     |                       |                   |                    |                       |                  | +                |
| ala-glu                    |                       |       |        |       |                     |                   |                         |                      |                |                     |                   |                     | +                   |                       |                   |                    |                       |                  |                  |
| acetamide                  |                       |       |        |       |                     |                   |                         |                      |                |                     |                   |                     | +                   |                       |                   |                    |                       |                  |                  |
| inosine                    |                       |       |        |       |                     |                   |                         |                      |                |                     |                   |                     |                     | +                     |                   |                    |                       |                  |                  |
| α-amino-N-valeric acid     |                       |       |        |       |                     |                   |                         |                      |                |                     |                   |                     |                     |                       |                   | -                  |                       |                  |                  |
| formamide                  |                       |       |        |       |                     |                   |                         |                      |                |                     |                   |                     |                     |                       |                   |                    | +                     |                  |                  |
| L-isoleucine               |                       |       |        | +     |                     |                   |                         |                      |                |                     |                   |                     |                     |                       |                   |                    |                       |                  |                  |
| L-leucine                  |                       |       |        | +     |                     |                   |                         |                      |                |                     |                   |                     |                     |                       |                   |                    |                       |                  |                  |

<sup>1</sup>Differences in respiration between WT and c3-null derivative have been scored as follows: +++, wt OD<sub>590</sub> > 4 x c3-null OD<sub>590</sub>; ++, wt OD<sub>590</sub> > 3 x c3-null OD<sub>590</sub>; +, wt OD<sub>590</sub> > 2 x c3-null OD<sub>590</sub>; ---, c3-null OD<sub>590</sub> > 4 x wt OD<sub>590</sub>; --, c3-null OD<sub>590</sub> > 3 x wt OD<sub>590</sub>; -, c3-null OD<sub>590</sub> > 2 x wt OD<sub>590</sub>.

<sup>2</sup>Phenotypes which are influenced by c3 in more than two species have been shaded.

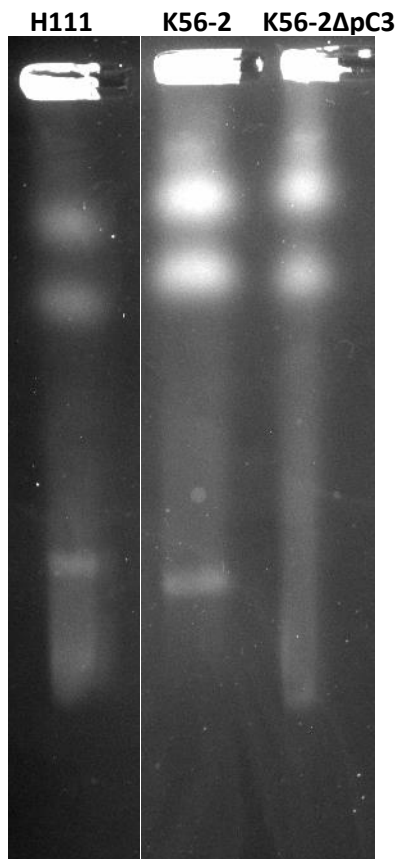

**FIG S3** Visualisation of undigested genomic DNA from wild-type *B. cenocepacia* K56-2 and its pC3-null derivative. Genomic DNA was separated by pulsed-field gel electrophoresis. *B. cenocepacia* H111 was included as a standard (left-most lane), since the size of each replicon is known for this strain. Lanes between those showing H111 and K56-2 and its pC3-null counterpart have been deleted for clarity, but band positions have not been altered.

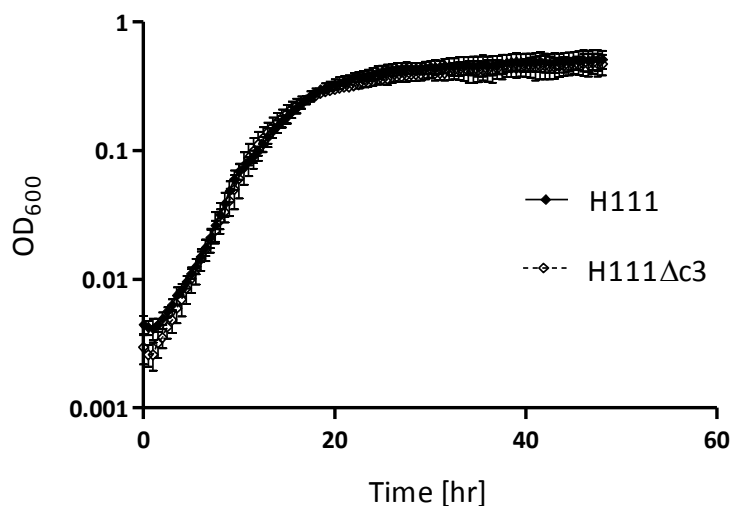

**FIG S4** H111 and its pC3-null mutant grow equally well in minimal salts medium. Growth curves were carried out in M9 minimal salts broth at 37 °C, and OD<sub>600</sub> was read every 30 mins. Average growth rates were as follows: H111, 0.47 doublings h<sup>-1</sup>; H111Δc3, 0.51 doublings h<sup>-1</sup>. Average saturation OD<sub>600</sub> H111, 0.49; H111Δc3, 0.45.

## References

1. Romling, U., et al., *Epidemiology of chronic Pseudomonas aeruginosa infections in cystic fibrosis*. Journal of Infectious Diseases, 1994. **170**(6): p. 1616-1621.
2. Gotschlich, A., et al., *Synthesis of multiple N-acylhomoserine lactones is wide-spread among the members of the Burkholderia cepacia complex*. Systematic and applied microbiology, 2001. **24**: p. 1-14.
3. Agnoli, K., et al., *Exposing the third chromosome of Burkholderia cepacia complex strains as a virulence plasmid*. Molecular Microbiology, 2012. **83**(2): p. 362-78.
4. Mahenthalingam, E., et al., *Diagnostically and experimentally useful panel of strains from the Burkholderia cepacia complex*. Journal of clinical microbiology, 2000. **38**(2): p. 910-3.
5. Herrero, M., V. Delorenzo, and K.N. Timmis, *Transposon Vectors Containing Non-Antibiotic Resistance Selection Markers for Cloning and Stable Chromosomal Insertion of Foreign Genes in Gram-Negative Bacteria*. Journal of bacteriology, 1990. **172**(11): p. 6557-6567.
6. Casadaban, M.J. and S.N. Cohen, *Analysis of gene control signals by DNA fusion and cloning in Escherichia coli*. Journal of molecular biology, 1980. **138**(2): p. 179-207.
7. Hoang, T.T., et al., *A broad-host-range Flp-FRT recombination system for site-specific excision of chromosomally-located DNA sequences: application for isolation of unmarked Pseudomonas aeruginosa mutants*. Gene, 1998. **212**(1): p. 77-86.
8. Kovach, M.E., et al., *pBBR1MCS: a broad-host-range cloning vector*. BioTechniques, 1994. **16**(5): p. 800-2.
9. Figurski, D.H. and D.R. Helinski, *Replication of an Origin-Containing Derivative of Plasmid Rk2 Dependent on a Plasmid Function Provided in Trans*. Proceedings of the National Academy of Sciences of the United States of America, 1979. **76**(4): p. 1648-1652.
10. Lanzer, M. and H. Bujard, *Promoters largely determine the efficiency of repressor action*. Proceedings of the National Academy of Sciences of the United States of America, 1988. **85**(23): p. 8973-7.
11. Payne, G.W., et al., *Development of a recA gene-based identification approach for the entire Burkholderia genus*. Applied and Environmental Microbiology, 2005. **71**(7): p. 3917-27.
12. Coenye, T., et al., *Burkholderia ambifaria sp. nov., a novel member of the Burkholderia cepacia complex including biocontrol and cystic fibrosis-related isolates*. INTERNATIONAL JOURNAL OF SYSTEMATIC AND EVOLUTIONARY MICROBIOLOGY, 2001. **51**(Pt 4): p. 1481-90.
13. Coenye, T. and P. Vandamme, *Diversity and significance of Burkholderia species occupying diverse ecological niches*. Environmental Microbiology, 2003. **5**: p. 719-729.
14. Vanlaere, E., et al., *Burkholderia latens sp. nov., Burkholderia diffusa sp. nov., Burkholderia arboris sp. nov., Burkholderia seminalis sp. nov. and Burkholderia metallica sp. nov., novel species within the Burkholderia cepacia complex*. International journal of systematic and evolutionary microbiology, 2008. **58**: p. 1580-90.
15. Vandamme, P., et al., *Occurrence of multiple genomovars of Burkholderia cepacia in cystic fibrosis patients and proposal of Burkholderia multivorans sp. nov.* International journal of systematic bacteriology, 1997. **47**: p. 1188-200.
16. Yabuuchi, E., et al., *Proposal of Burkholderia gen. nov. and transfer of seven species of the genus Pseudomonas homology group II to the new genus, with the type species Burkholderia cepacia (Palleroni and Holmes 1981) comb. nov.* Microbiology and immunology, 1992. **36**: p. 1251-75.
17. Vermis, K., et al., *Proposal to accommodate Burkholderia cepacia genomovar VI as Burkholderia dolosa sp. nov.* INTERNATIONAL JOURNAL OF SYSTEMATIC AND EVOLUTIONARY MICROBIOLOGY, 2004. **54**(Pt 3): p. 689-91.

18. Vanlaere, E., et al., *Taxon K, a complex within the Burkholderia cepacia complex, comprises at least two novel species, Burkholderia contaminans sp. nov. and Burkholderia lata sp. nov.* International journal of systematic and evolutionary microbiology, 2009. **59**: p. 102-11.
19. Vandamme, P., et al., *Identification and population structure of Burkholderia stabilis sp. nov. (formerly Burkholderia cepacia genomovar IV).* Journal of clinical microbiology, 2000. **38**(3): p. 1042-7.
